# Supplementary material for: First Case of KRT2 Epidermolytic Nevus and Novel Clinical and Genetic Findings in 26 Italian Patients with Keratinopathic Ichthyoses
Source: MDPI journal article supplement (doi:10.3390/ijms21207707), 2020-10-18
Supplement: s1 [file s1]

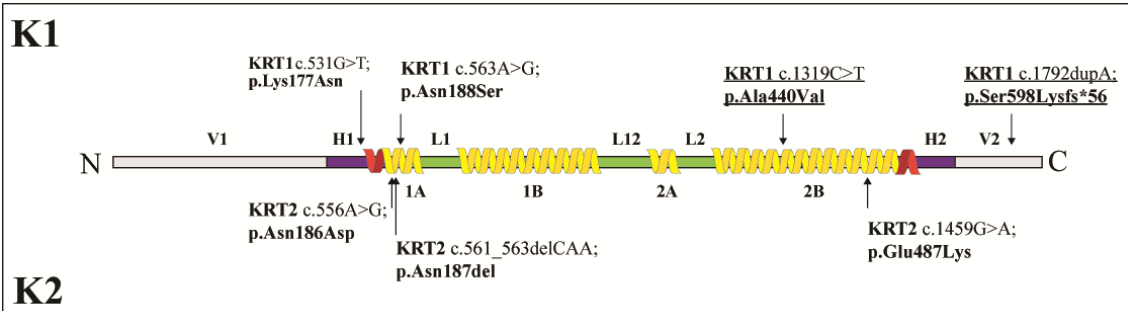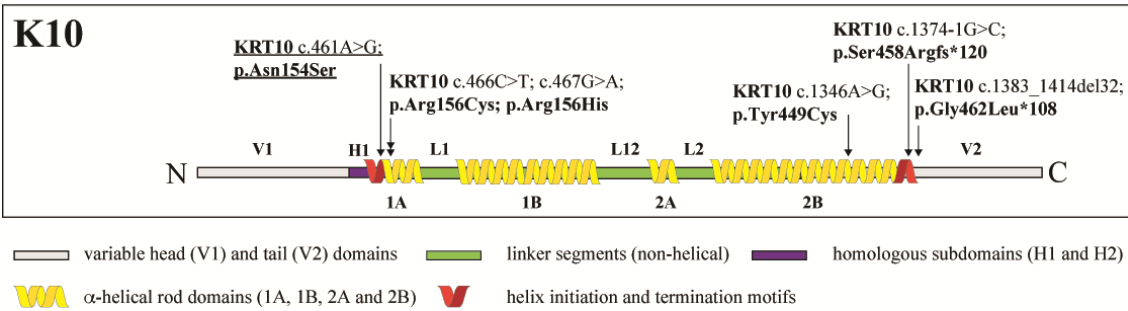

**Figure S1.** Keratin 1 (K1), K2 and K10 structural organization with the position of the pathogenic variants identified in this study. Novel mutations are underlined.

|                  |   |                                     |
|------------------|---|-------------------------------------|
| p.Ser598Lysfs*56 | → | ATA AAG AGA TGC CCT CTG TTT CAT TAG |
| p.Tyr587Leufs*67 |   | Ile Lys Arg Cys Pro Leu Phe His *   |
| p.Gly585Trpfs*69 |   |                                     |

**Figure S2.** *KRT1* frameshift mutations (listed on the left) that lead to stop codon readthrough resulting in an identical extension of 7 amino acids after the readthrough (right). The novel mutation described in this study is depicted in red; the natural stop codon is in bold.
